# Supplementary material
Source: PubMed Central journal article supplement (PMC2877936)

## **Supplemental Materials: Reduction of serum IgE in mice and in human cells by depletion of the IgE B cell lineage**

Hans D. Brightbill<sup>1</sup>, Surinder Jeet<sup>1</sup>, Zhonghua Lin<sup>1</sup>, Donghong Yan<sup>1</sup>, Meijuan Zhou<sup>1</sup>, Martha Tan<sup>2</sup>, Allen Nguyen<sup>2</sup>, Sherry Yeh<sup>2</sup>, Donnie Delarosa<sup>2</sup>, Steven R. Leong<sup>1</sup>, Terence Wong<sup>4</sup>, Yvonne Chen<sup>4</sup>, Mark Ultsch<sup>3</sup>, Elizabeth Luis<sup>5</sup>, Sree Ranjani Ramani<sup>5</sup>, Janet Jackman<sup>1</sup>, Lino Gonzalez<sup>5</sup>, Mark S. Dennis<sup>4</sup>, Anan Chuntharapai<sup>4</sup>, Laura DeForge<sup>2</sup>, Y. Gloria Meng<sup>2</sup>, Min Xu<sup>1</sup>, Charles Eigenbrot<sup>3</sup>, Wyne P. Lee<sup>1</sup>, Canio J. Refino<sup>1</sup>, Mercedesz Balazs<sup>1</sup>, and Lawren C. Wu<sup>1</sup>

Departments of <sup>1</sup>Immunology, <sup>2</sup>Assay and Automation Technology, <sup>3</sup>Protein Engineering, <sup>4</sup>Antibody Engineering, and <sup>5</sup>Protein Chemistry, Genentech, Inc., 1 DNA Way, South San Francisco, CA, 94080, USA

Conflict of interest statement: All authors are employed by Genentech, Inc., and hold equity in the Roche Group. In addition, the research in this manuscript was fully funded by Genentech, Inc.

Corresponding author:

Lawren C. Wu

Department of Immunology

Genentech, Inc.

1 DNA Way, MS 34

South San Francisco, CA 94080, USA

Phone: 650-225-1548

Fax: 650-742-1521

lawren@gene.com

## Supplemental Methods

*PCR genotype assay for M1' knockin mice.* A PCR-based genotyping assay for the presence of the M1' knockin allele was developed. The sequence of the forward primer is 5'-gggctggctggcggctccgc and the sequence of the reverse primer is 5'-ctatgccctggtctggaagatg, yielding a PCR product from the wildtype allele of 668 base pairs and the PCR product from the M1' knockin allele of 457 base pairs.

*Southern blot verification of M1' knockin mice.* 5 µg of genomic DNA from wild type or heterozygous knockin mice was digested with HindIII for Left Arm (LA) analysis or BamHI for Right Arm (RA) analysis. Probes were generated by PCR using the GC RICH PCR System (Roche). Primer sequences for generating the LA and RA probes are as follows: LA forward primer 5'-tgtctggtggtggacctggaaagcg; LA reverse primer 5'-tcctcgctctcctctctggtggtg; RA forward primer 5'-ccatgcaacctagatcctattctc; RA reverse primer 5'-ctttatacaggagaacctagcccag. Probes were detected with anti-digoxigenin-AP antibody and DIG wash and buffer set (Roche). The expected sizes of the wildtype and knockin mouse alleles are 7.4 kB (WT) and 3 kB (KI) for the LA probe; and 14.1 kB (WT) and 18.1 kB (KI) for the RA probe.

*Apoptosis crosslinking assay.* Daudi cells transfected with human membrane IgE were cultured in triplicate in cell culture medium, as recommended by ATCC, with 10 µg/ml anti-M1' antibody or isotype control antibody for 3 days in 24 well plates. For crosslinking conditions, 50 µg/ml anti-mouse IgG F(ab')<sub>2</sub> (Jackson ImmunoResearch) was also added to the cell culture medium. Cells were harvested and analyzed by FACS for levels of apoptosis using the Annexin V-FITC Apoptosis Detection Kit I

(BD Biosciences). Data was analyzed using FlowJo FACs analysis software (Tree Star).

*Calcium flux assay.* Daudi cell transfected with human membrane IgE labeled with 3 mM Fura-2 (Molecular Probes) at 37°C for 20 minutes. Cells were washed and resuspended in ice-cold calcium buffer (HEPES saline, 50 mM MgCl<sub>2</sub>, 100mM CaCl<sub>2</sub>, 1 mg/ml BSA). Prior to measurements, cells were warmed for 2 minutes at 37°C. Intracellular calcium flux was measured using a Hitachi F-4500 fluorimeter, and cells were stimulated with 20 µg/ml anti-M1' 47H4 mIgG1 antibody, goat anti-human IgM antibody (Jackson ImmunoResearch), control mIgG1 antibody, or 5 µM ionomycin, after establishment of a baseline signal for one minute. Maximum and minimum values for each sample were determined by treatment with 0.05% Triton-X100 or 2 mM EGTA, respectively. Results are reported as a ratio of fluorescence signal at 340nm vs. 380nm, normalized to the average baseline signal between 45 and 60 seconds.

*U266 apoptosis assay and IgE production.* U266 cells were cultured in triplicate (10<sup>6</sup>/mL) in cell culture medium, as recommended by ATCC, with anti-M1' antibody or isotype control antibody for 96 hours in 24 well plates. Cells were harvested and analyzed by FACS for levels of apoptosis using the Annexin V-FITC Apoptosis Detection Kit I (BD Biosciences). Data was analyzed using FlowJo FACs analysis software (Tree Star). Human IgE was measured in U266 culture supernatants using a human IgE ELISA (Genentech).

*U266 calcium flux assay.* U266 cells were labeled with 5  $\mu$ M Indo-1 (Molecular Probes) at  $5 \times 10^6$ /mL in complete media at 37°C for 30 minutes. Cells were washed and resuspended in complete media at  $1 \times 10^6$ /mL. Prior to measurements, cells were warmed for 2 minutes at 37°C. Intracellular calcium flux was measured using an Aria Flow Cytometer (BD), and cells were stimulated with 1  $\mu$ g/mL anti-M1' 47H4 mIgG1 antibody or 5  $\mu$ M ionomycin for 5 minutes, after establishment of a baseline signal for one minute. Results are reported as a ratio of unbound and bound Indo-1 dye. Data was analyzed using FlowJo FACS analysis software (Tree Star).

## Supplemental Table 1. Data collection and refinement for Fab-h47H4 / M1' peptide.

### Data collection

|                               |                                                   |
|-------------------------------|---------------------------------------------------|
| source                        | ESRF ID29                                         |
| space group                   | P212121                                           |
| cell parameters (Å, °)        | <b>a</b> =64.76, <b>b</b> =183.8, <b>c</b> =194.9 |
| Resolution (Å)                | 50 – 2.4 (2.49 – 2.40)                            |
| R <sub>sym</sub> , b          | 0.080 (0.508)                                     |
| Number of observations        | 325504                                            |
| Unique reflections            | 81785                                             |
| Completeness (%) <sup>b</sup> | 88.9 (72.3)                                       |
| I/slb                         | 15 (2.0)                                          |

### Refinement

|                                                          |                   |
|----------------------------------------------------------|-------------------|
| Resolution (Å)                                           | 50 – 2.4          |
| Number of reflections                                    | 81785             |
| Final R <sub>c</sub> , R <sub>FREE</sub>                 | 0.221, 0.261      |
| number of residues                                       | 1806              |
| number solvent molecules                                 | 276               |
| number of atoms <sup>d</sup>                             | 14071 (439)       |
| Mean B-factor (Å <sup>2</sup> )                          | 40                |
| R <sub>msd</sub> bonds (Å)                               | 0.010             |
| R <sub>msd</sub> angles (°)                              | 1.4               |
| R <sub>msd</sub> bonded B <sub>s</sub> (Å <sup>2</sup> ) | 2.2/2.8           |
| Number of TLS groups                                     | 8                 |
| RMSD NCS (Å)                                             | 0.7               |
| Ramachandran plot (%)                                    | 89, 9.7, 0.8, 0.5 |

a  $R_{\text{sym}} = \frac{\sum_i |I_i| - \langle I \rangle}{\sum_i |I_i|}$ , where  $I$  is the intensity of a single observation and  $\langle I \rangle$  the average intensity for symmetry equivalent observations.

b In parenthesis, for the highest resolution shell.

c  $R = \frac{\sum_i |F_o - F_c|}{\sum_i |F_o|}$ , where  $F_o$  and  $F_c$  are observed and calculated structure factor amplitudes, respectively. R<sub>FREE</sub> is calculated as R for 1015 reflections (2.6%) sequestered from refinement.

d In parenthesis, the number of atoms assigned less than unit occupancy.

## Supplemental Figure 1

Genotyping of the human M1' knockin mouse. **(A)** PCR genotyping assay for human M1' knockin mouse. The forward primer anneals upstream of the M1 exon splice acceptor site, and the reverse primer anneals in the M2 exon. The expected PCR product sizes are 688 base pairs for the wildtype allele and 457 base pairs for the M1' knockin allele, reflecting the insertion of the human M1' sequence. **(B)**

Southern blot verification of human M1' knockin mouse. Genomic DNA was digested with HindIII for the left arm or BamHI for the right arm. The left arm probes anneals within the region encoding the CH3 domain of mouse IgE, and the right arm probe anneals approximately 7 kB downstream of the M2 exon of mouse IgE. The expected sizes of the wildtype and knockin mouse alleles are 7.4 kB (WT) and 3 kB (KI) for the left arm probe, and 14.1 kB (WT) and 18.1 kB (KI) for the right arm probe.

A

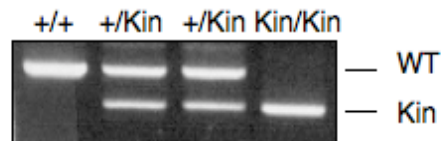

B

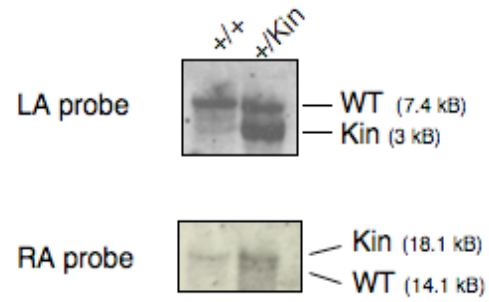

## Supplemental Figure 2

Characterization of human membrane IgE-transfected Daudi cells and assessment of anti-M1' antibody-induced apoptosis and intracellular calcium signaling. **(A)** Anti-M1' 47H4 antibody induces intracellular calcium signaling in human membrane IgE-transfected Daudi B cells, as detected by the ratio of fluorescence at 340 nM vs. 380 nM in Fura-2-labeled cells. **(B)** Flow cytometry analysis of human membrane IgE-transfected Daudi cells indicates a low level of human membrane IgE expression. Daudi cells express endogenous human membrane IgM. **(C)** Crosslinking of anti-M1' 47H4 antibody with anti-mouse IgG F(ab')<sub>2</sub> enhances the magnitude of anti-M1' 47H4 antibody-induced apoptosis.

A

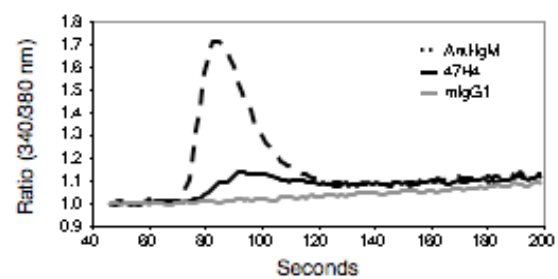

B

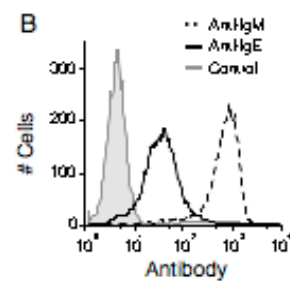

C

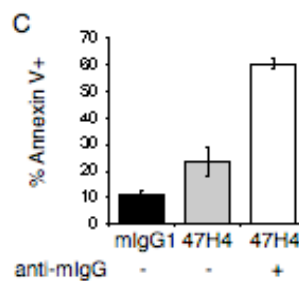

### Supplemental Figure 3

Assessment of anti-M1' antibody effects on U266 cells. **(A)** Anti-M1' 47H4 antibody does not induce apoptosis of U266 cells. Mouse IgG1 control antibody is at 10  $\mu\text{g/mL}$ . **(B)** Anti-M1' 47H4 antibody does not induce an intracellular calcium signal in U266 cells, as detected by the ratio of fluorescence at 405 nM vs. 485 nM in Indo-1-labeled cells. **(C)** Anti-M1' 47H4 antibody does not affect the production of soluble IgE from U266 cells. Mouse IgG1 control antibody is at 1  $\mu\text{g/mL}$ . **(D)** Flow cytometry analysis indicates a very low level of human membrane IgE expression on U266 cells.

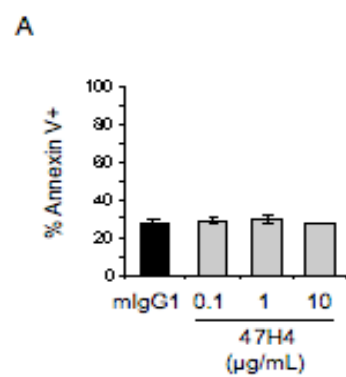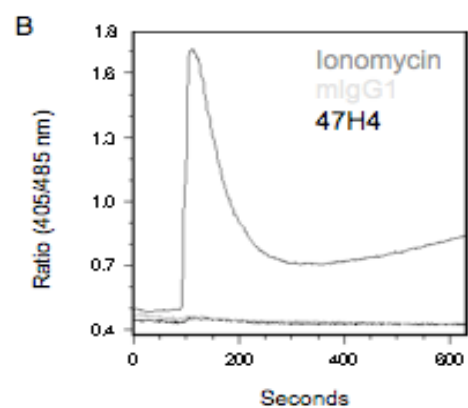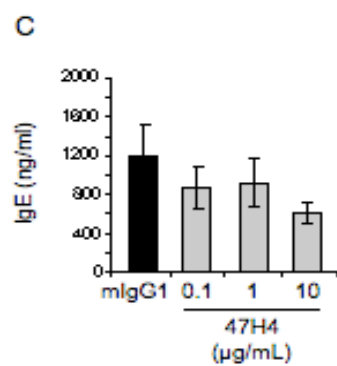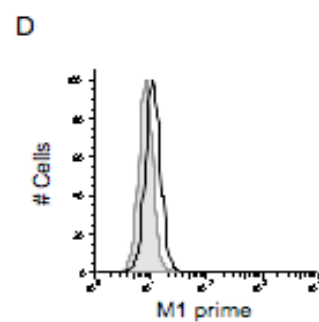

## Supplemental Figure 4

Characterization of total spleen B cells and serum IgE levels upon treatment of *N. brasiliensis* infection of M1' knockin mice with anti-M1' antibody. **(A)** Anti-M1' 47H4 antibody inhibits *N. brasiliensis*-induced serum IgE. Results are mean  $\pm$  SD.  $*P < 0.05$ . Data corresponds to the same study animals in which anti-M1' 47H4 antibody treatment reduced IgE-switched GFP<sup>+</sup> splenic B cells (Figure 6H). **(B)** Flow cytometry analysis of *N. brasiliensis*-infected mice indicates no significant difference in the percentage of total splenic CD19<sup>+</sup> B cells between anti-M1' 47H4 antibody and control antibody treated groups on day 21. Total splenic B cells are increased in *N. brasiliensis*-infected mice on day 21, as compared to uninfected mice. Results are mean  $\pm$  SD.  $*P < 0.001$ . Data corresponds to the same study animals in which anti-M1' 47H4 antibody treatment reduced IgE-switched GFP<sup>+</sup> splenic B cells (Figure 6H).

A

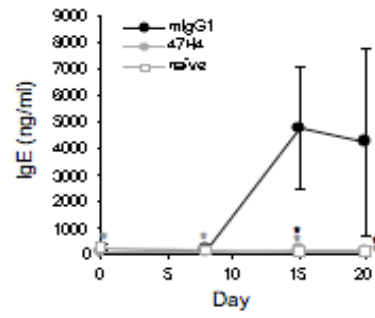

B

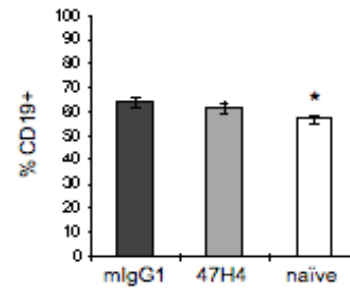

Supplement: JCI40141sd.pdf [file JCI40141sd.pdf]
